# Supplementary material
Source: PubMed Central journal article supplement (PMC3323674)

Table S1. Cleavage sites of  $\phi$ KZ proteins detected by a semi-tryptic peptide.

| gp                 | Residue <sup>1</sup> | Site <sup>2</sup>         |
|--------------------|----------------------|---------------------------|
| 84                 | 10                   | ISNE <u>VL</u> DV         |
| 86                 | 122                  | ISQE <u>AV</u> MA         |
| 89                 | 122                  | <u>FS</u> AE EYSD         |
| 89                 | 156                  | ASME <u>AN</u> DE         |
| 92 <sup>3,4</sup>  | 85                   | <u>VS</u> LE DL SK        |
| 93 <sup>3,4</sup>  | 13                   | LSLE <u>SI</u> ED         |
| 93                 | 156                  | ISLE <u>DL</u> KE         |
| 94 <sup>3</sup>    | 11                   | DSLE <u>GY</u> GV         |
| 94                 | 95                   | VASE <u>EY</u> PA         |
| 94                 | 275                  | <u>VS</u> NE <u>RV</u> TP |
| 95                 | 13                   | DSLE <u>DY</u> TE         |
| 95                 | 117                  | IAVE <u>TV</u> IP         |
| 95 <sup>4</sup>    | 133                  | QGGE <u>TV</u> TQ         |
| 95 <sup>3</sup>    | 260                  | ISTE <u>DI</u> KE         |
| 96                 | 65                   | VSTE <u>DI</u> SD         |
| 97                 | 13                   | ASLE <u>NQ</u> DG         |
| 97                 | 66                   | <u>IS</u> AE EHEE         |
| 97                 | 468                  | <u>AS</u> NE SMLE         |
| 97                 | 532                  | TSLE <u>SF</u> NS         |
| 120 <sup>3,4</sup> | 54                   | <u>IS</u> HE NFGT         |
| 120                | 84                   | YGFE <u>RV</u> SS         |
| 120                | 163                  | VGLE <u>NY</u> NE         |

|                  |     |                         |
|------------------|-----|-------------------------|
| 129              | 262 | IATE <u>THHF</u>        |
| 153              | 52  | ISQE <u>ANFA</u>        |
| 162 <sup>3</sup> | 17  | ASLE <u>RVSD</u>        |
| 162              | 137 | <u>PSNE</u> DISI        |
| 162              | 200 | <u>TALE</u> NYIG        |
| 162              | 258 | ASIE <u>VLDN</u>        |
| 163              | 54  | FALE <u>SIDP</u>        |
| 175              | 210 | <u>PALE</u> NYED        |
| 177              | 60  | <u>ASVE</u> EFFE        |
| 177              | 297 | <u>LASE</u> <u>ANNV</u> |
| 180_180_2        | 505 | YSEE <u>AIAE</u>        |
| 184              | 108 | YGHE <u>HFDE</u>        |
| 203 <sup>3</sup> | 653 | <u>ESLE</u> SYVD        |
| 303              | 60  | YSNE <u>EWVE</u>        |
| 303 <sup>3</sup> | 153 | IFVE <u>ADTT</u>        |
| 303              | 268 | AALE <u>EFIE</u>        |
| 303              | 366 | <u>VSNE</u> GLID        |

<sup>1</sup>The coordinate of the conserved glutamate immediately preceding the cleavage.

<sup>2</sup>Sequence identified in a semi-tryptic fragment is underlined.

<sup>3</sup>Peptide assigned with a minimum peptide identification probability <95% according to Scaffold

<sup>4</sup>low abundance peptide.

Table S2. Conservation of cleavage sites detected by mass spectrometry in  $\phi$ KZ and 201 $\phi$ 2-1 in homologous proteins.

| $\phi$ KZ gp | $\phi$ KZ<br>cleavage<br>site/motif <sup>1</sup>                        | 201 $\phi$ 2-1<br>gp | 201 $\phi$ 2-1<br>cleavage<br>site/motif <sup>1</sup> | $\phi$ PA3 gp | $\phi$ PA3<br>cleavage<br>motif <sup>1</sup>  |
|--------------|-------------------------------------------------------------------------|----------------------|-------------------------------------------------------|---------------|-----------------------------------------------|
| 84           | <b>ISNE-10</b>                                                          | 145                  | <u>ISTE-9</u>                                         | 86            | <u>LSME-10</u>                                |
| 86           | <b>ISQE-122</b>                                                         | 148                  | <u>ISQE-113</u>                                       | 89            | <u>VSNE-110</u>                               |
| 89           | <b>FSAE-122</b><br><b>ASME-156</b>                                      | 151                  | LAFE-112nr<br><u>ASLE-166</u>                         | 92            | <u>FSKE-118</u><br>YSME-145nr                 |
| 92           | <b>VSLE-85</b>                                                          | 154                  | <u>VSNE-79</u>                                        | 95            | <u>ISTE-84</u>                                |
| 93*          | <b>LSLE-13</b><br><b>ISLE-156</b>                                       | 155                  | <b>VSLE-13 NA</b><br><br><b>AALE-327</b>              | 100           | LSQE-12 NA<br><u>VSLE-216</u>                 |
| 94*          | <b>DSLE-11</b><br><b>VSNE-275</b>                                       | 156                  | <br><u>PSNE-157</u>                                   | 99            | <br><u>PANE-156</u>                           |
| 95*          | <b>DSLE-13</b><br><b>IAVE-117</b><br><b>QGGE-133</b><br><b>ISTE-260</b> | 157                  | VSNE-15 NA<br>NA<br>NA<br><u>IALE-207</u>             | 100           | <u>LSQE-12</u><br>nr<br>nr<br><u>VSLE-216</u> |
| 96           | <b>VSLE-65</b>                                                          | 158                  | <u>LSLE-60</u>                                        | 101           | <u>VSLE-71</u>                                |
| 97           | <b>ASLE-13</b><br><b>ISAE-66</b><br><b>ASNE-468</b><br><b>TSLE-532</b>  | 159                  | NA<br>NA<br><u>ELSE-567</u><br>ASLE-630nr             | 102           | NA<br>NA<br><u>TTVE-494</u><br>TSLE-555nr     |

|            |                                                                         |       |                                                                              |                                                                           |
|------------|-------------------------------------------------------------------------|-------|------------------------------------------------------------------------------|---------------------------------------------------------------------------|
| no homolog |                                                                         | 193   | <b>GSLE-139</b>                                                              | no homolog                                                                |
| 120        | <b>ISHE-54</b><br><b>YGFE-84</b><br><b>VGLE-163</b>                     | 200   | <u>IGTE-57</u><br><u>YGFE-86</u><br><u>VALE-161</u>                          | 136<br><u>IGNE-52</u><br><u>YGFE-81</u><br><u>VGLE-163</u>                |
| 129        | <b>IATE-262</b>                                                         | 214   | <u>MEAE-272</u>                                                              | 148<br><u>LEAE-186</u>                                                    |
| 153        | <b>ISQE-52</b>                                                          | 238   | <u>ISTE-64</u>                                                               | 176<br><u>VSTE-68</u>                                                     |
| 162*       | <b>ASLE-17</b><br><b>PSNE-137</b><br><b>TALE-200</b><br><b>ASIE-258</b> | 246   | <b>IANE-16 NA</b><br><b>TSVE-128nr</b><br><u>ASIE-203</u><br><u>VSLE-258</u> | 186<br><u>ISME-16</u><br><b>TSVE-124nr</b><br><u>AAVE-193</u><br>sites nr |
| 163*       | <b>FALE-54</b>                                                          | 247   | <u>TALE-50</u>                                                               | 187<br><u>IGLE-50</u>                                                     |
| 175        | <b>PALE-210</b>                                                         | 268   | <u>PALE-218</u>                                                              | 205<br><u>PALE-216</u>                                                    |
| 177        | <b>ASVE-60</b><br><b>LASE-297</b>                                       | 271   | <u>VAVE-61</u><br><u>LRNE-293</u>                                            | 208<br><u>ASVE-60</u>                                                     |
| 178        |                                                                         | 274/3 | <b>VTFE-275</b>                                                              | 211                                                                       |
| 180_180_2  | <b>YSEE-505</b>                                                         | 275   | <u>YSEE-504</u>                                                              | 212<br><u>YSKE-504</u>                                                    |
| 184        | <b>ASLE-13 NA</b><br><b>NA</b><br><b>YGHE-108</b>                       | 280   | <b>KGLE-15</b><br><b>VSAE-72</b><br><b>NA</b>                                | 217<br><b>LSLE-11 NA</b><br><b>NA</b><br><b>NA</b>                        |
| 203        | <b>ELSE-653</b>                                                         | 300   | nr                                                                           | 233<br><u>ASFE-102</u>                                                    |
| 303        | <b>NA</b><br><b>YSNE-60</b><br><b>NA</b><br><b>IFVE-153</b>             | 455   | <b>VSNE-20</b><br><b>NA</b><br><b>PGME-151</b><br><b>NA</b>                  | 375<br><b>NA</b><br><b>NA</b><br><u>ISIE-16</u><br><b>NA</b>              |

|                 |                        |           |
|-----------------|------------------------|-----------|
| <b>AALE-268</b> | <b>NA</b>              | <b>NA</b> |
| <b>VSNE-366</b> | <b><u>ISNE-179</u></b> | <b>NA</b> |

<sup>1</sup> Red indicates cleavage confirmed by detection of semi-tryptic peptide in mass spectral analyses. Identified cleavages in 201φ2-1 are from (Thomas *et al.*, 2010). Black indicates putative cleavage sites in homologous proteins determined by Blastp alignment, cleavages/motifs aligning perfectly are underlined. nr, refers to putative cleavage motif found near (usually within 10 residues), but not aligning with, a known cleavage site in an homologous protein. sites nr, refers to putative cleavage motifs near, but not aligning with, a known cleavage site in an homologous protein. NA, refers to no alignment in corresponding region of homolog [some putative cleavage motifs were identified in these regions based on their being within ~20 residues of the N-terminus of the protein and therefore candidates for a capsid targeting sequence or CTS (Mullaney and Black, 1996)]. Blank, refers to no identifiable cleavage site. Asterisks indicates members of the PF12699 family.

**Table S3.** Conservation of T4 processed proteins among representatives of the T4-like phage subfamily. Taxonomically, JS98, RB43, RB49 and 44RR2.8t are members of the T4-like phage genus, whereas KVP40 and P-SSM2 are outside of the T4-like phage genus (Lavigne *et al.*, 2009). Divergence is measured as diverged from 100-percent identity of a BlastP match. The terminase protein, tail sheath and tube proteins are included as being representatives of highly conserved morphogenesis proteins. Proteins shaded in the same color have genes located in the same module. Proteins with names/gps in red indicate high abundance capsid proteins (>100 copies). A dash indicates no homologs were identified using BlastP.

| T4 protein,<br>functional<br>classification: | Divergence of homologs to T4 proteins (%) |                 |               |                 |               |               |                   |                   |                 |                 | IPI,  | IPII, | IPIII, | alt, |     |
|----------------------------------------------|-------------------------------------------|-----------------|---------------|-----------------|---------------|---------------|-------------------|-------------------|-----------------|-----------------|-------|-------|--------|------|-----|
|                                              | terminase<br>gp17,                        | sheath<br>gp18, | tube<br>gp19, | portal<br>gp20, | core<br>gp67, | core<br>gp68, | protease<br>gp21, | scaffold<br>gp22, | capsid<br>gp23, | vertex<br>gp24, |       |       |        |      |     |
|                                              | essen                                     | essen           | essen         | essen           | essen         | semi-<br>E    | essen             | essen             | essen           | essen           | essen | aux   | aux    | aux  | aux |
| JS98                                         | 18                                        | 29              | 29            | 25              | 47            | 29            | 11                | 22                | 16              | 30              | -     | -     | 14     | -    |     |
| RB43                                         | 31                                        | 39              | 39            | 47              | 50            | 48            | 38                | 47                | 30              | 58              | -     | -     | -      | -    |     |
| RB49                                         | 31                                        | 38              | 51            | 43              | 60            | 43            | 44                | 46                | 33              | 55              | -     | -     | -      | -    |     |
| 44RR2.8t                                     | 37                                        | 40              | 36            | 43              | 47            | 50            | 45                | 53                | 30              | 56              | -     | -     | -      | -    |     |
| KVP40                                        | 46                                        | 52              | 44            | 54              | 80            | 60            | 51                | 62                | 40              | 70              | -     | -     | -      | -    |     |
| P-SSM2                                       | 65                                        | 73              | 68            | 62              | -             | -             | 58                | 76                | 65              | -               | -     | -     | -      |      |     |

<sup>1</sup>Classification of gene function as essential (essen), semi-essential (semi-E) or auxillary (aux) was obtained from (Miller *et al.*, 2003)

**Table S4.** Conservation of the homologs to  $\phi$ KZ processed proteins among representatives of the  $\phi$ KZ-related phages. Divergence is measured as 100-percent identity (determined using BlastP). The terminase protein, tail sheath and tube proteins are included as being representatives of highly conserved morphogenesis proteins. Gp90 is also included as it is an abundant inner head protein. Proteins shaded in the same color have genes located in the same module. Proteins with names/gps in red indicate high abundance capsid proteins (>100 copies). A dash indicates no homologs were identified using BlastP.

| Divergence of homologs to $\phi$ KZ proteins (%) |           |        |      |            |      |      |      |      |      |      |      |      |      |      |
|--------------------------------------------------|-----------|--------|------|------------|------|------|------|------|------|------|------|------|------|------|
| $\phi$ KZ                                        | terminase | sheath | tube | RNAP beta" |      |      |      |      |      |      |      |      |      |      |
| protein:                                         | gp25      | gp29   | gp30 | gp80       | gp84 | gp86 | gp89 | gp90 | gp92 | gp93 | gp94 | gp95 | gp96 | gp97 |
| 201 $\phi$ 2-1                                   | 40        | 27     | 29   | 44         | 66   | 76   | 46   | 53   | 69   | 73   | 71   | 79   | 73   | 70   |
| $\phi$ PA3                                       | 31        | 30     | 27   | 35         | 64   | 76   | 37   | 52   | 62   | 62   | 79   | 74   | 67   | 70   |
| EL                                               | 73        | 76     | 79   | 77         | 78   | -    | 74   | 84   | -    | -    | -    | -    | -    | -    |

  

|                |               |       |       |          |       |       |       |       |             |      |          |       |
|----------------|---------------|-------|-------|----------|-------|-------|-------|-------|-------------|------|----------|-------|
| $\phi$ KZ      | <b>capsid</b> |       |       | protease |       | RNAP  |       | RNAP  |             |      | helicase |       |
| protein:       | gp120         | gp129 | gp153 | gp162    | gp163 | gp175 | gp177 | gp178 | gp180_180_2 | 184P | gp203    | gp303 |
| 201 $\phi$ 2-1 | 36            | 49    | 73    | 76       | 55    | 45    | 59    | 47    | 32          | 41   | 49       | 72    |
| $\phi$ PA3     | 32            | 44    | 68    | 73       | 47    | 41    | 53    | 42    | 25          | 45   | 42       | 70    |
| EL             | 79            | 80    | -     | -        | -     | 71    | -     | 70    | 68          | -    | 71       | -     |

## References

- Lavigne, R., Darius, P., Summer, E.J., Seto, D., Mahadevan, P., Nilsson, A.S., *et al.* (2009) Classification of *Myoviridae* bacteriophages using protein sequence similarity. *Bmc Microbiol* **9**: 224.
- Miller, E.S., Kutter, E., Mosig, G., Arisaka, F., Kunisawa, T. and Ruger, W. (2003) Bacteriophage T4 Genome. *Microbiol. Mol. Biol. Rev.* **67**: 86-156.
- Mullaney, J.M. and Black, L.W. (1996) Capsid targeting sequence targets foreign proteins into bacteriophage T4 and permits proteolytic processing. *J. Mol. Biol.* **261**: 372-385.
- Thomas, J.A., Weintraub, S.T., Hakala, K., Serwer, P. and Hardies, S.C. (2010) Proteome of the large *Pseudomonas* myovirus 201phi2-1: Delineation of proteolytically processed virion proteins. *Molecular & Cellular Proteomics* **9**: 940-951.



Supplemental Figure 1. Electron micrograph of purified tailless  $\phi$ KZ heads negatively stained with 1% phosphotungstic acid.

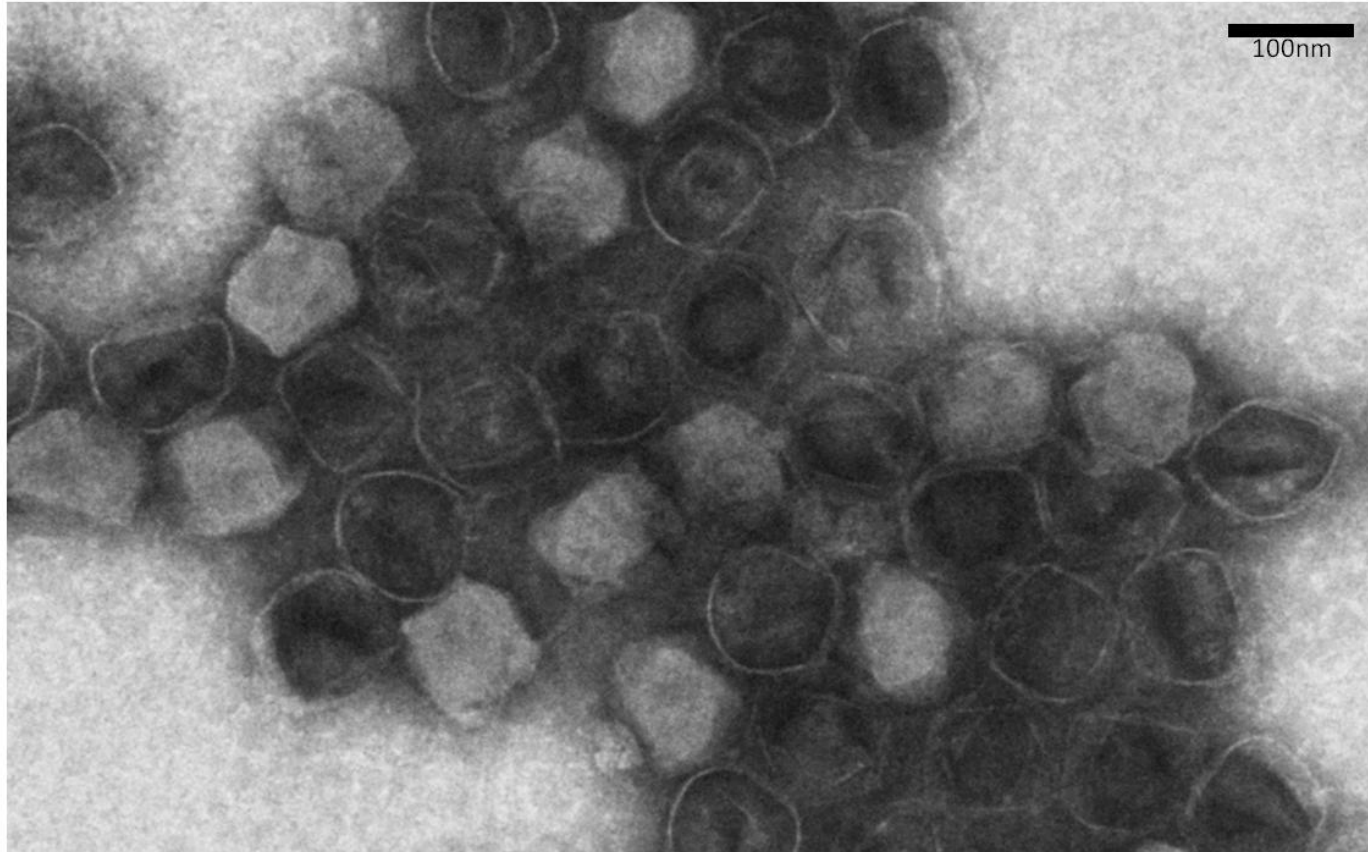

Supplemental Figure 2. Sequence logo representing a total of 39 cleavage sites in  $\phi$ KZ determined by detection of a semi-tryptic peptide. Logo was created using Weblogo (<http://weblogo.berkeley.edu/>). The co-ordinates of the cleavage sites used for construction of the logo are listed in Table S1.

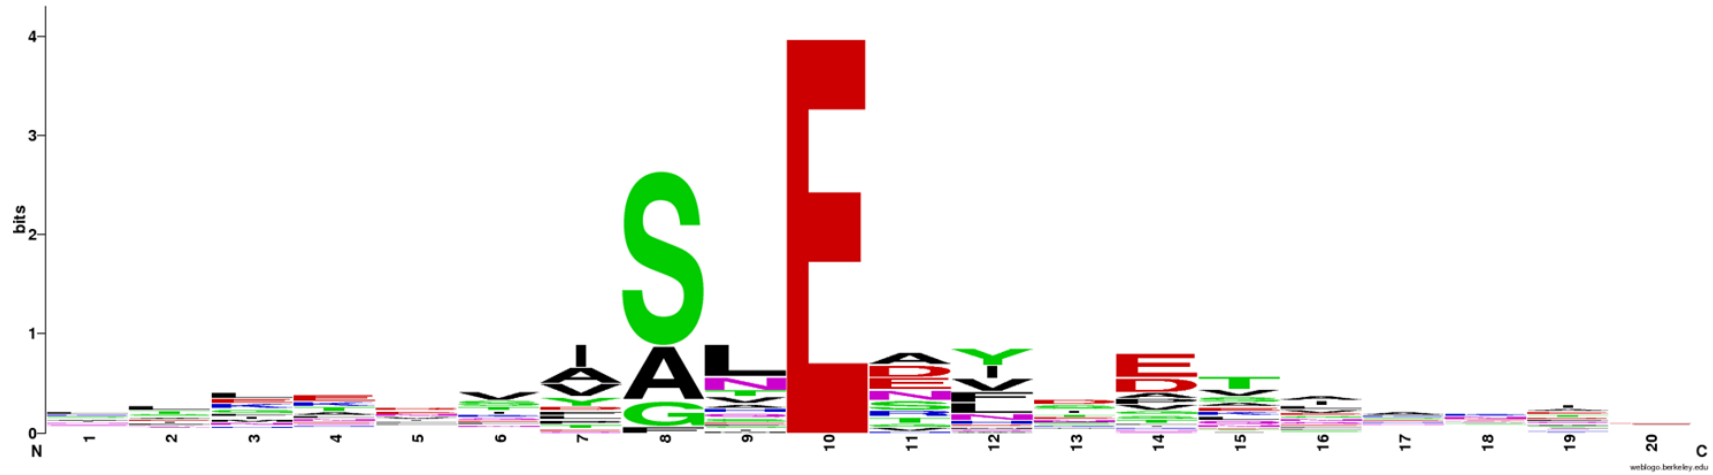

Supplemental Figure 3. Montage of serial slices through a cryo-electron tomogram of a  $\phi$ KZ capsid produced in the presence of 9-aminoacridine. Each slice is 172 nm across and 1.6 nm thick, with a separation between slices of 4.7 nm.

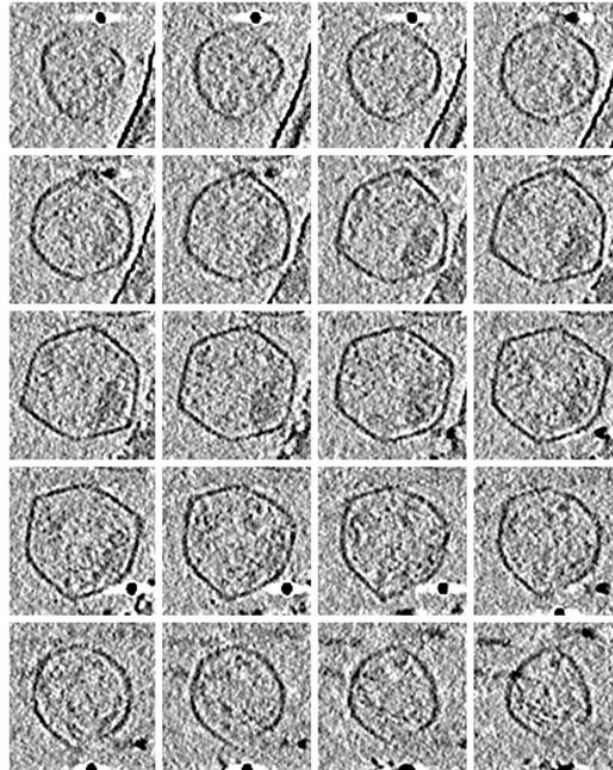

Supplemental Figure 4. Purified  $\phi$ KZ capsid-related particles produced in the presence of 9-aminoacridine stained with 2.5% ammonium molybdate and 10% trehalose.

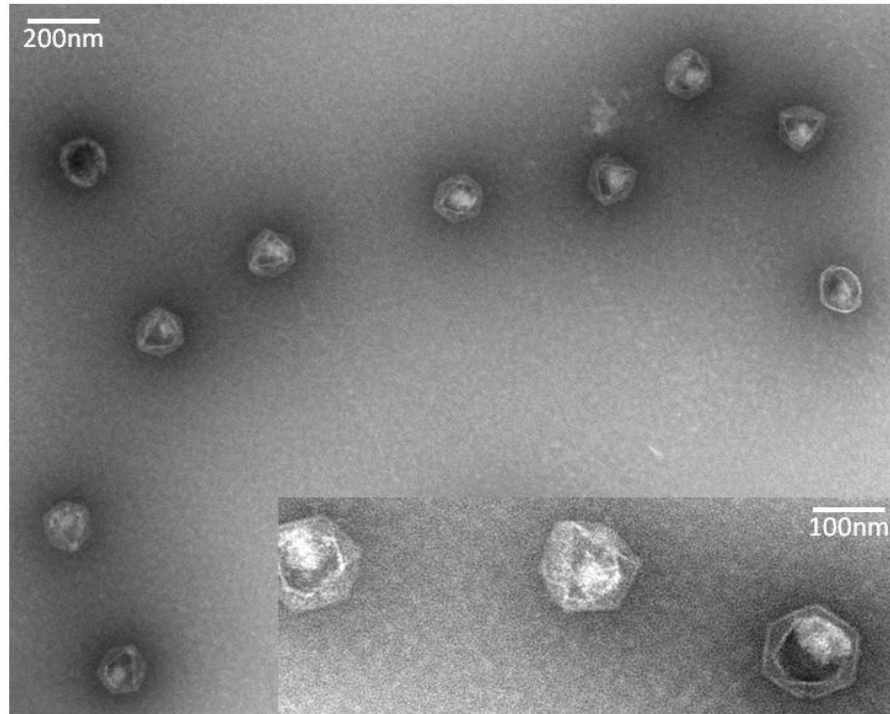

Supplemental Figure 5. Electron micrograph of empty  $\phi$ KZ capsid shells after osmotic shock treatment. Sample is Fraction 6 of the glycerol gradient in Figure 7A. Sample was negatively stained with 1% phosphotungstic acid. Space bar represents 100 nm.

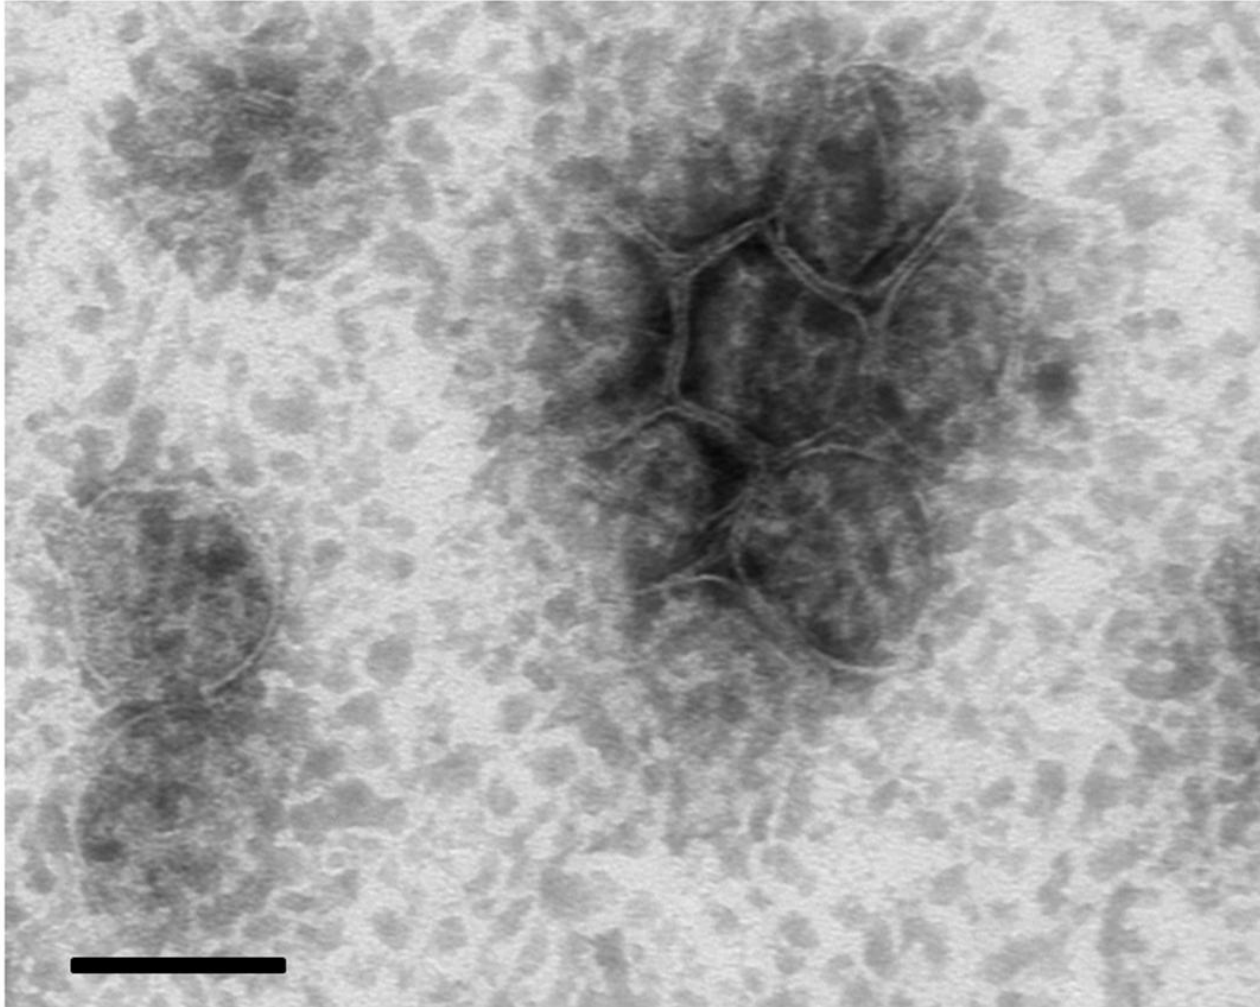

Supplement: NIHMS360605-supplement-Supp_Table_S1-S4___Fig_S1-S5.pdf [file NIHMS360605-supplement-Supp_Table_S1-S4___Fig_S1-S5.pdf]
